# Supplementary material for: The diel vertical migration of microbes within snowpacks driven by solar radiation and nutrients
Source: Copernicus journal article supplement (doi:10.5194/egusphere-2024-1193), 2024-05-02
Supplement: Supplementary file 1 [file egusphere-2024-1193-supplement.pdf]

Title of the manuscript: The diel vertical migration of microbes within snowpacks driven by solar radiation and nutrients

Authors: Masato Ono<sup>1</sup>, Nozomu Takeuchi<sup>2</sup>, Krzysztof Zawierucha<sup>3</sup>

<sup>1</sup> Center for Ecological Research, Kyoto University, Japan

<sup>2</sup> Department of Earth Science, Graduate School of Science, Chiba University, Chiba, Japan

This file includes three supplementary figures. Legends are below and all figures are in next page.

Supplementary Figure S1: Photograph of a snow core collected on May 7th, 2021.

Supplementary Figure S2: The vertical distribution of microbes every three hours. %: Percentage of cell concentration or population density of each layer in the total five layers.

Supplementary Figure S3: The vertical distribution of microbes in the snow core. %: Percentage of chlorophyll *a* concentration, cell concentration, and population density of each layer in all layers.

Supplementary Figure S4: The chemical composition in each layer every three hours.

Supplementary Figure S5: Correlation between each chemical solute. Significant differences ( $p < 0.01$ ) are shown in asterisk.

Supplementary Figure S6: The vertical distribution of chemical solutes every three hours.

Supplementary Table S1: Chlorophyll *a* concentration, cell concentration, and population density of microbes every three hours. Their maximum, minimum in each layer is shown in each column. ND: Low abundance (under  $1.7 \times 10^3$  cells L<sup>-1</sup>).

Supplementary Table S2: Results of Chi-square test for vertical distribution of microbes between nighttime and daytime. Significant differences ( $p < 0.05$ ) are shown in bold.

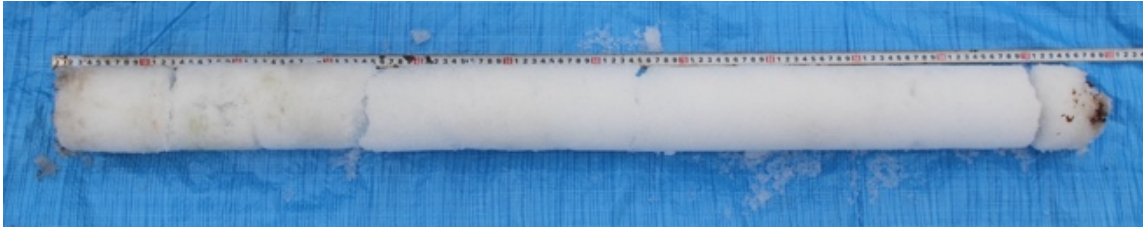

**Supplementary Figure S1: Photograph of a snow core collected on May 7th, 2021.**

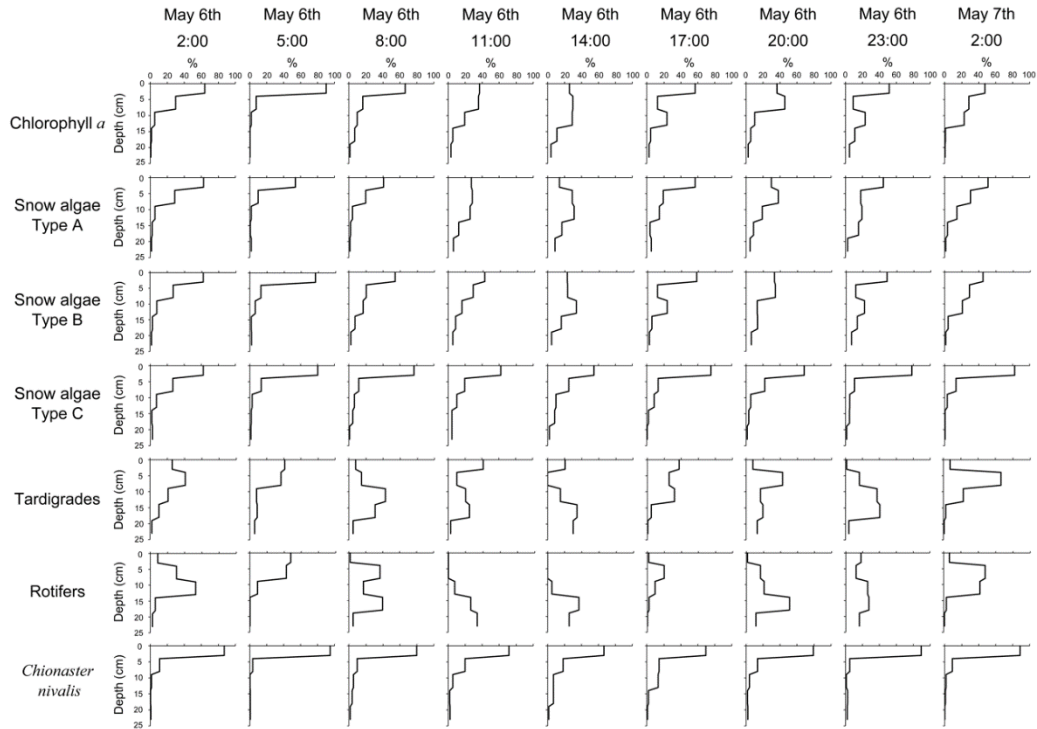

**Supplementary Figure S2: The vertical distribution of microbes every three hours. %: Percentage of cell concentration or population density of each layer in the total of five layers.**

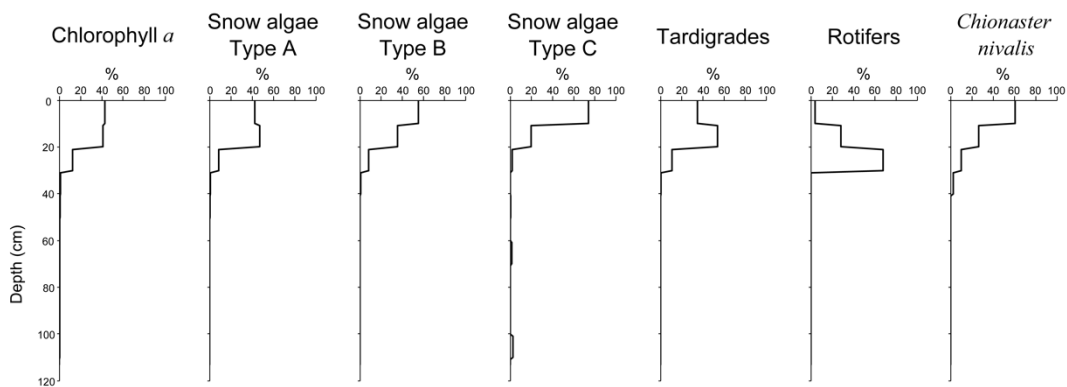

**Supplementary Figure S3: The vertical distribution of microbes in the snow core. %: Percentage of chlorophyll *a* concentration, cell concentration, and population density of each layer in all layers.**

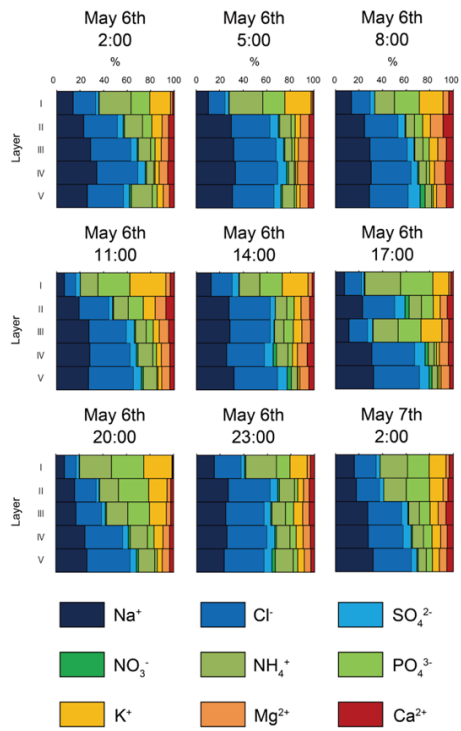

Supplementary Figure S4: The chemical composition in each layer every three hours.

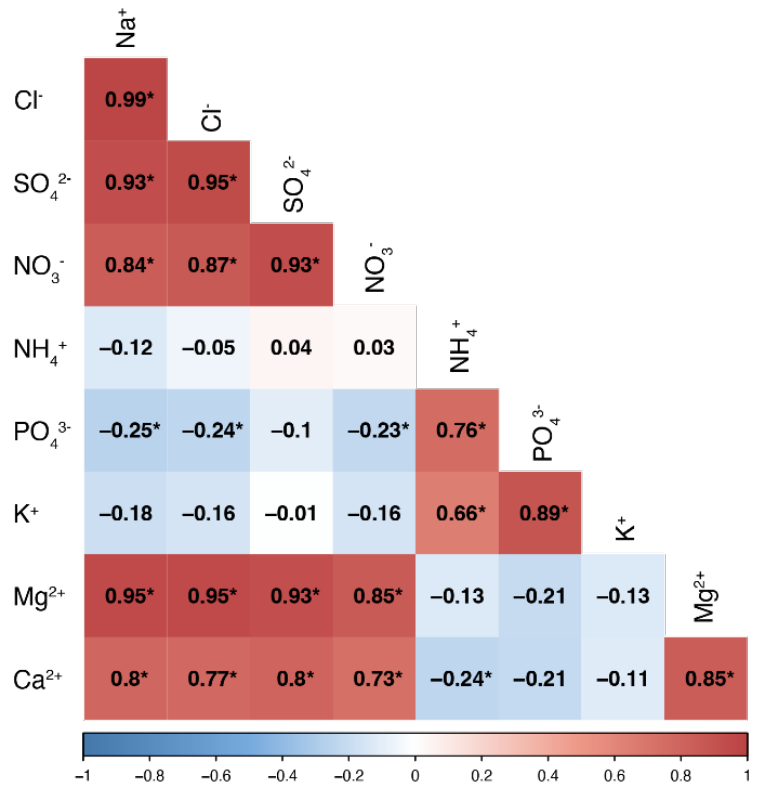

Supplementary Figure S5: Correlation between each chemical solute. Significant differences ( $p < 0.01$ ) are shown in asterisk.

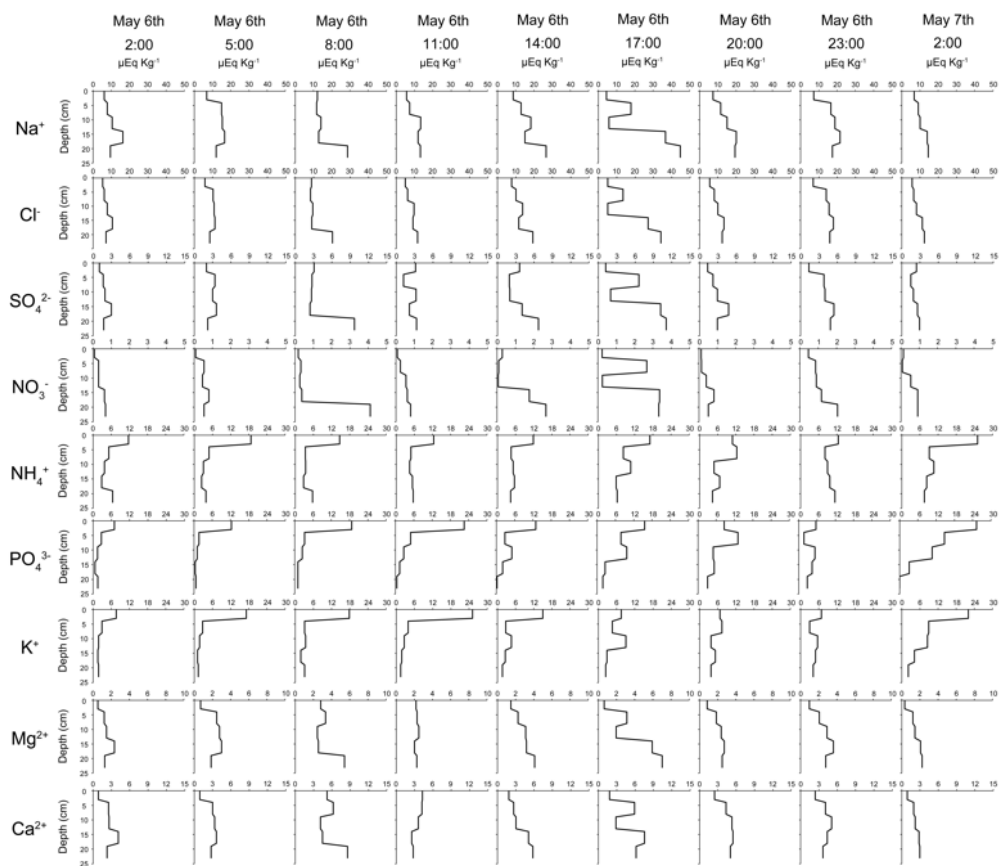

**Supplementary Figure S6: The vertical distribution of chemical solutes every three hours.**

| Microbes                                              | Layer (depth) | Concentration or density                 |                                          |                                          |                                          |                                          |                                          |                                          |                                          |                                          |  |
|-------------------------------------------------------|---------------|------------------------------------------|------------------------------------------|------------------------------------------|------------------------------------------|------------------------------------------|------------------------------------------|------------------------------------------|------------------------------------------|------------------------------------------|--|
|                                                       |               | 2:00 May 6th                             | 5:00 May 6th                             | 8:00 May 6th                             | 11:00 May 6th                            | 14:00 May 6th                            | 17:00 May 6th                            | 20:00 May 6th                            | 23:00 May 6th                            | 2:00 7th May                             |  |
| Chlorophyll <i>a</i><br>( $\mu\text{g L}^{-1}$ )      | I (0-3 cm)    | 4.0×10 <sup>5</sup> -5.3×10 <sup>2</sup> | 3.7×10 <sup>5</sup> -1.1×10 <sup>3</sup> | 1.3×10 <sup>5</sup> -6.5×10 <sup>2</sup> | 1.8×10 <sup>5</sup> -3.3×10 <sup>2</sup> | 0.3×10 <sup>5</sup> -1.6×10 <sup>2</sup> | 2.2×10 <sup>5</sup> -1.4×10 <sup>3</sup> | 1.5×10 <sup>5</sup> -4.2×10 <sup>2</sup> | 3.3×10 <sup>5</sup> -7.1×10 <sup>2</sup> | 5.2×10 <sup>5</sup> -1.8×10 <sup>3</sup> |  |
|                                                       | II (3-8 cm)   | 0.9×10 <sup>5</sup> -2.2×10 <sup>2</sup> | 0.3×10 <sup>5</sup> -1.4×10 <sup>2</sup> | 0.7×10 <sup>5</sup> -2.2×10 <sup>2</sup> | 1.2×10 <sup>5</sup> -2.2×10 <sup>2</sup> | 0.4×10 <sup>5</sup> -1.3×10 <sup>2</sup> | 8.7-1.1×10 <sup>3</sup>                  | 1.4×10 <sup>5</sup> -9.3×10 <sup>2</sup> | 0.7×10 <sup>5</sup> -1.7×10 <sup>2</sup> | 2.9×10 <sup>5</sup> -1.1×10 <sup>3</sup> |  |
|                                                       | III (8-13 cm) | 0.2×10 <sup>5</sup> -1.0×10 <sup>2</sup> | 0.2×10 <sup>5</sup> -1.2×10 <sup>2</sup> | 0.7×10 <sup>5</sup> -1.1×10 <sup>2</sup> | 0.2×10 <sup>5</sup> -2.5×10 <sup>2</sup> | 0.3×10 <sup>5</sup> -2.5×10 <sup>2</sup> | 3.5-7.9×10 <sup>2</sup>                  | 0.1×10 <sup>5</sup> -4.4×10 <sup>2</sup> | 0.2×10 <sup>5</sup> -5.2×10 <sup>2</sup> | 0.4×10 <sup>5</sup> -7.4×10 <sup>2</sup> |  |
|                                                       | IV (13-18 cm) | 4.5-0.5×10 <sup>2</sup>                  | 6.6-0.2×10 <sup>2</sup>                  | 0.3×10 <sup>5</sup> -0.5×10 <sup>2</sup> | 9.2-1.7×10 <sup>2</sup>                  | 0.3×10 <sup>5</sup> -1.2×10 <sup>2</sup> | 0.9-3.7×10 <sup>2</sup>                  | 0.9×10 <sup>5</sup> -2.0×10 <sup>2</sup> | 8.0-6.6×10 <sup>2</sup>                  | 0.1×10 <sup>5</sup> -2.5×10 <sup>2</sup> |  |
|                                                       | V (18-23 cm)  | 6.1-0.2×10 <sup>2</sup>                  | 0.1×10 <sup>5</sup> -0.2×10 <sup>2</sup> | 6.0-0.4×10 <sup>2</sup>                  | 9.5-0.4×10 <sup>2</sup>                  | 3.3-0.3×10 <sup>2</sup>                  | 1.2-2.3×10 <sup>2</sup>                  | 0.2×10 <sup>5</sup> -1.5×10 <sup>2</sup> | 0.7-3.8×10 <sup>2</sup>                  | 2.4-0.9×10 <sup>2</sup>                  |  |
| Snow algae<br>Type A<br>(cells L <sup>-1</sup> )      | I (0-3 cm)    | 9.9×10 <sup>5</sup> -1.4×10 <sup>7</sup> | 1.4×10 <sup>5</sup> -5.4×10 <sup>7</sup> | 2.4×10 <sup>5</sup> -2.3×10 <sup>7</sup> | 3.7×10 <sup>5</sup> -5.3×10 <sup>6</sup> | 4.1×10 <sup>5</sup> -5.2×10 <sup>6</sup> | 1.9×10 <sup>5</sup> -2.7×10 <sup>7</sup> | 6.2×10 <sup>5</sup> -1.8×10 <sup>7</sup> | 2.2×10 <sup>5</sup> -3.7×10 <sup>7</sup> | 1.2×10 <sup>5</sup> -6.1×10 <sup>7</sup> |  |
|                                                       | II (3-8 cm)   | 1.9×10 <sup>5</sup> -1.2×10 <sup>7</sup> | 4.6×10 <sup>5</sup> -4.3×10 <sup>6</sup> | 9.7×10 <sup>5</sup> -4.4×10 <sup>6</sup> | 3.8×10 <sup>5</sup> -5.7×10 <sup>6</sup> | 7.3×10 <sup>5</sup> -4.2×10 <sup>6</sup> | 1.1×10 <sup>5</sup> -3.2×10 <sup>7</sup> | 4.6×10 <sup>5</sup> -9.1×10 <sup>6</sup> | 4.6×10 <sup>5</sup> -6.5×10 <sup>6</sup> | 1.1×10 <sup>5</sup> -4.4×10 <sup>7</sup> |  |
|                                                       | III (8-13 cm) | 1.5×10 <sup>5</sup> -1.3×10 <sup>6</sup> | 7.5×10 <sup>5</sup> -2.0×10 <sup>6</sup> | 7.5×10 <sup>5</sup> -1.5×10 <sup>6</sup> | 3.9×10 <sup>5</sup> -5.5×10 <sup>6</sup> | 3.7×10 <sup>5</sup> -8.7×10 <sup>6</sup> | 8.2×10 <sup>5</sup> -4.9×10 <sup>6</sup> | 3.7×10 <sup>5</sup> -2.0×10 <sup>7</sup> | 4.9×10 <sup>5</sup> -4.9×10 <sup>6</sup> | 3.8×10 <sup>5</sup> -2.9×10 <sup>7</sup> |  |
|                                                       | IV (13-18 cm) | 3.5×10 <sup>5</sup> -3.7×10 <sup>6</sup> | 7.0×10 <sup>5</sup> -1.1×10 <sup>7</sup> | 3.9×10 <sup>5</sup> -9.4×10 <sup>6</sup> | 2.0×10 <sup>5</sup> -1.5×10 <sup>7</sup> | 2.8×10 <sup>5</sup> -1.7×10 <sup>6</sup> | 2.1×10 <sup>5</sup> -1.1×10 <sup>7</sup> | 1.1×10 <sup>5</sup> -2.5×10 <sup>6</sup> | 1.6×10 <sup>5</sup> -1.8×10 <sup>6</sup> | 1.5×10 <sup>5</sup> -1.5×10 <sup>6</sup> |  |
|                                                       | V (18-23 cm)  | 5.0×10 <sup>5</sup> -9.3×10 <sup>6</sup> | 5.3×10 <sup>5</sup> -1.8×10 <sup>6</sup> | 4.7×10 <sup>5</sup> -5.0×10 <sup>6</sup> | 1.4×10 <sup>5</sup> -6.5×10 <sup>6</sup> | 9.0×10 <sup>5</sup> -3.7×10 <sup>6</sup> | 5.3×10 <sup>5</sup> -5.0×10 <sup>6</sup> | 1.9×10 <sup>5</sup> -9.0×10 <sup>6</sup> | 1.5×10 <sup>5</sup> -8.4×10 <sup>6</sup> | 3.0×10 <sup>5</sup> -7.7×10 <sup>6</sup> |  |
| Snow algae<br>Type B<br>(cells L <sup>-1</sup> )      | I (0-3 cm)    | 1.9×10 <sup>5</sup> -2.8×10 <sup>7</sup> | 2.4×10 <sup>5</sup> -3.0×10 <sup>7</sup> | 3.8×10 <sup>5</sup> -5.3×10 <sup>7</sup> | 1.7×10 <sup>5</sup> -5.1×10 <sup>6</sup> | 2.2×10 <sup>5</sup> -8.3×10 <sup>6</sup> | 9.8×10 <sup>5</sup> -6.6×10 <sup>6</sup> | 5.1×10 <sup>5</sup> -1.1×10 <sup>7</sup> | 4.0×10 <sup>5</sup> -4.9×10 <sup>6</sup> | 1.1×10 <sup>5</sup> -6.2×10 <sup>6</sup> |  |
|                                                       | II (3-8 cm)   | 6.1×10 <sup>5</sup> -1.4×10 <sup>7</sup> | 2.4×10 <sup>5</sup> -7.7×10 <sup>6</sup> | 2.3×10 <sup>5</sup> -3.2×10 <sup>6</sup> | 1.6×10 <sup>5</sup> -7.3×10 <sup>6</sup> | 6.3×10 <sup>5</sup> -1.7×10 <sup>6</sup> | 1.1×10 <sup>5</sup> -1.1×10 <sup>6</sup> | 7.5×10 <sup>5</sup> -1.8×10 <sup>6</sup> | 1.6×10 <sup>5</sup> -1.8×10 <sup>6</sup> | 3.2×10 <sup>5</sup> -5.1×10 <sup>6</sup> |  |
|                                                       | III (8-13 cm) | 7.2×10 <sup>5</sup> -3.0×10 <sup>6</sup> | 4.5×10 <sup>5</sup> -2.6×10 <sup>6</sup> | 4.5×10 <sup>5</sup> -6.2×10 <sup>6</sup> | 1.3×10 <sup>5</sup> -1.5×10 <sup>6</sup> | 6.8×10 <sup>5</sup> -2.2×10 <sup>6</sup> | 5.6×10 <sup>5</sup> -4.2×10 <sup>6</sup> | 6.0×10 <sup>5</sup> -1.0×10 <sup>7</sup> | 7.4×10 <sup>5</sup> -2.0×10 <sup>6</sup> | 8.1×10 <sup>5</sup> -1.7×10 <sup>6</sup> |  |
|                                                       | IV (13-18 cm) | 1.9×10 <sup>5</sup> -1.2×10 <sup>6</sup> | 1.5×10 <sup>5</sup> -5.5×10 <sup>6</sup> | 4.6×10 <sup>5</sup> -3.1×10 <sup>6</sup> | 1.5×10 <sup>5</sup> -6.6×10 <sup>6</sup> | 1.8×10 <sup>5</sup> -2.0×10 <sup>6</sup> | 5.2×10 <sup>5</sup> -1.6×10 <sup>6</sup> | 1.1×10 <sup>5</sup> -4.5×10 <sup>6</sup> | 5.9×10 <sup>5</sup> -3.6×10 <sup>6</sup> | 1.9×10 <sup>5</sup> -5.1×10 <sup>6</sup> |  |
|                                                       | V (18-23 cm)  | 4.4×10 <sup>5</sup> -5.1×10 <sup>6</sup> | 2.2×10 <sup>5</sup> -1.3×10 <sup>6</sup> | 2.2×10 <sup>5</sup> -1.4×10 <sup>6</sup> | 2.1×10 <sup>5</sup> -9.4×10 <sup>6</sup> | 2.8×10 <sup>5</sup> -9.1×10 <sup>6</sup> | 2.3×10 <sup>5</sup> -1.6×10 <sup>6</sup> | 5.1×10 <sup>5</sup> -2.7×10 <sup>6</sup> | 1.7×10 <sup>5</sup> -8.8×10 <sup>6</sup> | 5.8×10 <sup>5</sup> -2.5×10 <sup>6</sup> |  |
| Snow algae<br>Type C<br>(cells L <sup>-1</sup> )      | I (0-3 cm)    | 8.0×10 <sup>5</sup> -1.4×10 <sup>6</sup> | 4.0×10 <sup>5</sup> -9.0×10 <sup>6</sup> | 7.6×10 <sup>5</sup> -2.1×10 <sup>6</sup> | 1.6×10 <sup>5</sup> -6.2×10 <sup>6</sup> | 4.2×10 <sup>5</sup> -1.2×10 <sup>6</sup> | 2.2×10 <sup>5</sup> -2.1×10 <sup>6</sup> | 7.7×10 <sup>5</sup> -2.8×10 <sup>6</sup> | 3.3×10 <sup>5</sup> -2.1×10 <sup>6</sup> | 1.5×10 <sup>5</sup> -2.7×10 <sup>6</sup> |  |
|                                                       | II (3-8 cm)   | 1.0×10 <sup>5</sup> -1.7×10 <sup>6</sup> | 1.0×10 <sup>4</sup> -4.4×10 <sup>6</sup> | 1.1×10 <sup>5</sup> -2.3×10 <sup>6</sup> | 4.2×10 <sup>5</sup> -1.0×10 <sup>6</sup> | 1.3×10 <sup>5</sup> -3.3×10 <sup>6</sup> | ND-5.3×10 <sup>6</sup>                   | 2.0×10 <sup>5</sup> -4.2×10 <sup>6</sup> | 1.1×10 <sup>5</sup> -5.0×10 <sup>6</sup> | 1.3×10 <sup>5</sup> -2.0×10 <sup>6</sup> |  |
|                                                       | III (8-13 cm) | 2.0×10 <sup>5</sup> -3.3×10 <sup>6</sup> | ND-3.3×10 <sup>6</sup>                   | 4.7×10 <sup>5</sup> -9.3×10 <sup>6</sup> | 6.3×10 <sup>5</sup> -3.7×10 <sup>6</sup> | 3.0×10 <sup>5</sup> -1.8×10 <sup>6</sup> | 6.7×10 <sup>5</sup> -6.0×10 <sup>6</sup> | 2.5×10 <sup>5</sup> -1.6×10 <sup>6</sup> | ND-3.3×10 <sup>6</sup>                   | ND-1.3×10 <sup>6</sup>                   |  |
|                                                       | IV (13-18 cm) | ND-1.7×10 <sup>6</sup>                   | ND-8.3×10 <sup>6</sup>                   | 1.6×10 <sup>5</sup> -8.7×10 <sup>6</sup> | 1.3×10 <sup>5</sup> -1.5×10 <sup>6</sup> | 1.3×10 <sup>5</sup> -1.3×10 <sup>6</sup> | 3.3×10 <sup>5</sup> -1.3×10 <sup>6</sup> | 1.7×10 <sup>5</sup> -7.3×10 <sup>6</sup> | 5.0×10 <sup>5</sup> -1.3×10 <sup>6</sup> | ND-5.6×10 <sup>6</sup>                   |  |
|                                                       | V (18-23 cm)  | ND-1.7×10 <sup>6</sup>                   | 2.0×10 <sup>5</sup> -5.0×10 <sup>6</sup> | 1.8×10 <sup>5</sup> -3.8×10 <sup>6</sup> | 2.8×10 <sup>5</sup> -1.7×10 <sup>6</sup> | 3.3×10 <sup>5</sup> -3.0×10 <sup>6</sup> | 5.0×10 <sup>5</sup> -6.7×10 <sup>6</sup> | 3.3×10 <sup>5</sup> -7.1×10 <sup>6</sup> | 1.7×10 <sup>5</sup> -1.0×10 <sup>6</sup> | ND-8.3×10 <sup>6</sup>                   |  |
| Tardigrades<br>(ind L <sup>-1</sup> )                 | I (0-3 cm)    | 7.8×10 <sup>5</sup> -3.0×10 <sup>3</sup> | 1.0×10 <sup>5</sup> -3.5×10 <sup>4</sup> | 0.9×10 <sup>5</sup> -3.1×10 <sup>3</sup> | 0.7×10 <sup>5</sup> -1.1×10 <sup>3</sup> | 0-4.7×10 <sup>3</sup>                    | 0.5×10 <sup>5</sup> -1.7×10 <sup>3</sup> | 5.6×10 <sup>5</sup> -2.1×10 <sup>3</sup> | 0-4.8×10 <sup>3</sup>                    | 3.1×10 <sup>5</sup> -2.3×10 <sup>4</sup> |  |
|                                                       | II (3-8 cm)   | 2.3×10 <sup>5</sup> -3.2×10 <sup>3</sup> | 1.2×10 <sup>5</sup> -2.0×10 <sup>4</sup> | 0-1.5×10 <sup>3</sup>                    | 0.1×10 <sup>5</sup> -0.7×10 <sup>2</sup> | 0                                        | 0-1.1×10 <sup>3</sup>                    | 0.9×10 <sup>5</sup> -3.7×10 <sup>4</sup> | 1.7×10 <sup>5</sup> -9.8×10 <sup>3</sup> | 3.9×10 <sup>5</sup> -9.0×10 <sup>4</sup> |  |
|                                                       | III (8-13 cm) | 1.9×10 <sup>5</sup> -4.5×10 <sup>3</sup> | 2.6×10 <sup>5</sup> -3.7×10 <sup>3</sup> | 1.5×10 <sup>5</sup> -3.4×10 <sup>3</sup> | 0-1.7×10 <sup>3</sup>                    | 0-3.4×10 <sup>2</sup>                    | 0-1.8×10 <sup>4</sup>                    | 5.9×10 <sup>5</sup> -1.8×10 <sup>4</sup> | 2.0×10 <sup>5</sup> -2.1×10 <sup>4</sup> | 1.0×10 <sup>5</sup> -3.3×10 <sup>4</sup> |  |
|                                                       | IV (13-18 cm) | 0.9×10 <sup>5</sup> -2.5×10 <sup>3</sup> | 1.1×10 <sup>5</sup> -1.2×10 <sup>3</sup> | 1.7×10 <sup>5</sup> -1.8×10 <sup>3</sup> | 0.4×10 <sup>5</sup> -2.4×10 <sup>3</sup> | 0.8×10 <sup>5</sup> -1.4×10 <sup>3</sup> | 0-4.0×10 <sup>3</sup>                    | 9.1×10 <sup>5</sup> -7.9×10 <sup>3</sup> | 4.0×10 <sup>5</sup> -1.5×10 <sup>3</sup> | 0.8×10 <sup>5</sup> -5.3×10 <sup>3</sup> |  |
|                                                       | V (18-23 cm)  | 0.8×10 <sup>5</sup> -3.4×10 <sup>3</sup> | 1.5×10 <sup>5</sup> -7.4×10 <sup>2</sup> | 0-1.0×10 <sup>3</sup>                    | 0-0.3×10 <sup>2</sup>                    | 0-4.5×10 <sup>2</sup>                    | 0-2.5×10 <sup>3</sup>                    | 8.6×10 <sup>5</sup> -1.1×10 <sup>3</sup> | 0-5.8×10 <sup>3</sup>                    | 0.3×10 <sup>5</sup> -1.5×10 <sup>3</sup> |  |
| Rotifers<br>(ind L <sup>-1</sup> )                    | I (0-3 cm)    | 0-1.2×10 <sup>2</sup>                    | 0.3×10 <sup>5</sup> -5.7×10 <sup>2</sup> | 0-0.4×10 <sup>2</sup>                    | 0                                        | 0                                        | 0-1.0×10 <sup>3</sup>                    | 0-1.6×10 <sup>2</sup>                    | 0-7.5×10 <sup>2</sup>                    | 0-4.1×10 <sup>3</sup>                    |  |
|                                                       | II (3-8 cm)   | 0-3.5×10 <sup>2</sup>                    | 0.2×10 <sup>5</sup> -1.2×10 <sup>3</sup> | 0-3.2×10 <sup>2</sup>                    | 0                                        | 0                                        | 0-1.1×10 <sup>4</sup>                    | 0.6×10 <sup>5</sup> -1.1×10 <sup>3</sup> | 0-9.9×10 <sup>2</sup>                    | 5.4×10 <sup>5</sup> -1.1×10 <sup>4</sup> |  |
|                                                       | III (8-13 cm) | 0-2.3×10 <sup>2</sup>                    | 0-7.0×10 <sup>2</sup>                    | 0-2.8×10 <sup>2</sup>                    | 0-9.9                                    | 0-0.3×10 <sup>2</sup>                    | 0-4.9×10 <sup>3</sup>                    | 0.9×10 <sup>5</sup> -3.5×10 <sup>3</sup> | 0.4×10 <sup>5</sup> -8.7×10 <sup>2</sup> | 2.1×10 <sup>5</sup> -7.9×10 <sup>3</sup> |  |
|                                                       | IV (13-18 cm) | 0-0.7×10 <sup>2</sup>                    | 0-0.2×10 <sup>2</sup>                    | 0-1.9×10 <sup>2</sup>                    | 0-0.3×10 <sup>2</sup>                    | 0-0-1×10 <sup>2</sup>                    | 0-1.2×10 <sup>3</sup>                    | 1.7×10 <sup>5</sup> -4.1×10 <sup>3</sup> | 1.5×10 <sup>5</sup> -3.7×10 <sup>2</sup> | 0-2.5×10 <sup>2</sup>                    |  |
|                                                       | V (18-23 cm)  | 0-0.3×10 <sup>2</sup>                    | 0-0.1×10 <sup>2</sup>                    | 0-1.4×10 <sup>2</sup>                    | 0-0.1×10 <sup>2</sup>                    | 0-1.2×10 <sup>2</sup>                    | 0-1.9×10 <sup>2</sup>                    | 1.1×10 <sup>5</sup> -4.2×10 <sup>2</sup> | 0-1.8×10 <sup>2</sup>                    | 0-0.7×10 <sup>2</sup>                    |  |
| <i>Chionaster nivalis</i><br>(cells L <sup>-1</sup> ) | I (0-3 cm)    | 7.7×10 <sup>5</sup> -1.1×10 <sup>6</sup> | 7.3×10 <sup>5</sup> -2.8×10 <sup>6</sup> | 1.1×10 <sup>5</sup> -1.6×10 <sup>6</sup> | 2.0×10 <sup>5</sup> -7.8×10 <sup>6</sup> | 9.0×10 <sup>5</sup> -3.0×10 <sup>6</sup> | 3.3×10 <sup>5</sup> -5.1×10 <sup>6</sup> | 4.2×10 <sup>5</sup> -1.4×10 <sup>6</sup> | 9.0×10 <sup>5</sup> -6.2×10 <sup>6</sup> | 2.2×10 <sup>5</sup> -5.2×10 <sup>6</sup> |  |
|                                                       | II (3-8 cm)   | 1.7×10 <sup>5</sup> -8.2×10 <sup>5</sup> | 1.0×10 <sup>5</sup> -5.0×10 <sup>5</sup> | 6.7×10 <sup>5</sup> -2.5×10 <sup>5</sup> | 1.0×10 <sup>5</sup> -1.8×10 <sup>5</sup> | 4.3×10 <sup>5</sup> -1.3×10 <sup>5</sup> | 3.3×10 <sup>5</sup> -2.1×10 <sup>5</sup> | 1.3×10 <sup>5</sup> -7.3×10 <sup>5</sup> | 6.7×10 <sup>5</sup> -1.0×10 <sup>5</sup> | 4.0×10 <sup>5</sup> -7.7×10 <sup>5</sup> |  |
|                                                       | III (8-13 cm) | 3.3×10 <sup>5</sup> -2.2×10 <sup>5</sup> | 1.0×10 <sup>5</sup> -8.9×10 <sup>4</sup> | 1.3×10 <sup>5</sup> -6.0×10 <sup>4</sup> | 3.8×10 <sup>5</sup> -1.7×10 <sup>5</sup> | 1.5×10 <sup>5</sup> -5.3×10 <sup>4</sup> | 1.2×10 <sup>5</sup> -8.0×10 <sup>4</sup> | 3.3×10 <sup>5</sup> -6.7×10 <sup>4</sup> | 3.3×10 <sup>5</sup> -6.3×10 <sup>4</sup> | 7.0×10 <sup>5</sup> -2.0×10 <sup>5</sup> |  |
|                                                       | IV (13-18 cm) | 1.3×10 <sup>5</sup> -3.3×10 <sup>4</sup> | 1.8×10 <sup>5</sup> -3.0×10 <sup>4</sup> | 8.9×10 <sup>5</sup> -3.3×10 <sup>4</sup> | 8.3×10 <sup>5</sup> -1.2×10 <sup>5</sup> | 6.7×10 <sup>5</sup> -5.3×10 <sup>4</sup> | 6.7×10 <sup>5</sup> -1.7×10 <sup>5</sup> | 6.7×10 <sup>5</sup> -7.3×10 <sup>4</sup> | 1.3×10 <sup>5</sup> -1.0×10 <sup>4</sup> | ND-3.3×10 <sup>4</sup>                   |  |
|                                                       | V (18-23 cm)  | 1.0×10 <sup>5</sup> -7.7×10 <sup>4</sup> | 1.2×10 <sup>5</sup> -5.3×10 <sup>4</sup> | ND-1.8×10 <sup>4</sup>                   | 2.2×10 <sup>5</sup> -4.0×10 <sup>4</sup> | ND-1.2×10 <sup>4</sup>                   | ND-1.2×10 <sup>5</sup>                   | ND-2.5×10 <sup>4</sup>                   | ND-3.0×10 <sup>5</sup>                   | ND-3.3×10 <sup>4</sup>                   |  |

**Supplementary Table S1: Chlorophyll *a* concentration, cell concentration, and population density of microbes every three hours. Their maximum, minimum, in each layer are shown in each column. ND: Low abundance (under  $1.7 \times 10^3$  cells L<sup>-1</sup>)**

|                               | Pearson's chi-square test |    |              |
|-------------------------------|---------------------------|----|--------------|
|                               | $\chi^2$                  | df | p < 0.05     |
| Microbes                      |                           |    |              |
| Chlorophyll <i>a</i>          | 9.921                     | 4  | <b>0.042</b> |
| Snow algae Type A             | 15.722                    | 4  | <b>0.003</b> |
| Snow algae Type B             | 26.059                    | 4  | <b>0.000</b> |
| Snow algae Type C             | 6.585                     | 4  | 0.160        |
| Tardigrades                   | 37.084                    | 4  | <b>0.000</b> |
| Rotifers                      | 71.056                    | 4  | <b>0.000</b> |
| <i>Chionaster nivalis</i>     | 7.100                     | 4  | 0.131        |
| Components                    |                           |    |              |
| Na <sup>+</sup>               | 1.455                     | 4  | 0.835        |
| Cl <sup>-</sup>               | 1.359                     | 4  | 0.851        |
| SO <sub>4</sub> <sup>2-</sup> | 1.198                     | 4  | 0.878        |
| NO <sub>3</sub> <sup>-</sup>  | 0.247                     | 4  | 0.993        |
| NH <sub>4</sub> <sup>+</sup>  | 0.282                     | 4  | 0.991        |
| PO <sub>4</sub> <sup>3-</sup> | 2.347                     | 4  | 0.672        |
| K <sup>+</sup>                | 2.639                     | 4  | 0.620        |
| Mg <sup>2+</sup>              | 0.517                     | 4  | 0.972        |
| Ca <sup>2+</sup>              | 0.193                     | 4  | 0.996        |

**Supplementary Table S2: Results of Chi-square test for vertical distribution of microbes between nighttime and daytime. Significant differences (p < 0.05) are shown in bold.**
